# Supplementary material for: Cuttlebone Fillers for Topical Hemorrhage and Wound Healing: In Vitro Insights and a Suppository Model
Source: Research Square preprint supplement (doi:10.21203/rs.3.rs-102614/v1), 2020-11-11
Supplement: Supplementary file 1 [file 3c24cf76014dbebd33d26ae3.docx]

Additional file 1

1.1 Stages of blood clotting capacity test


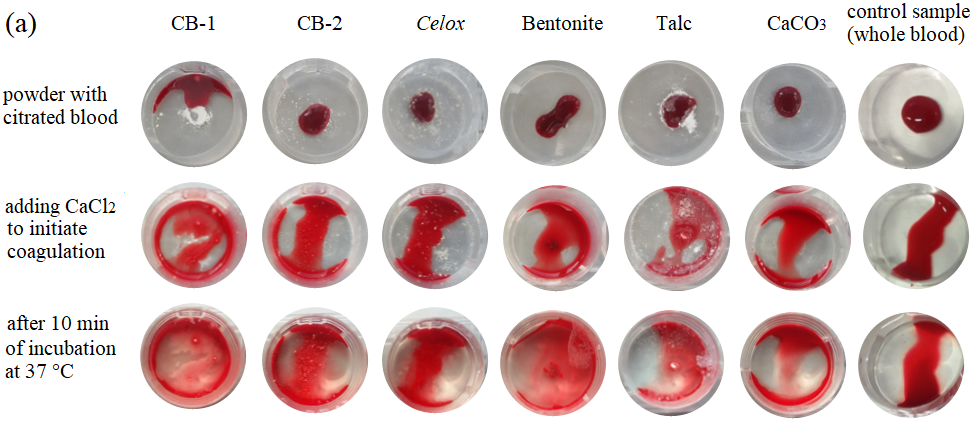


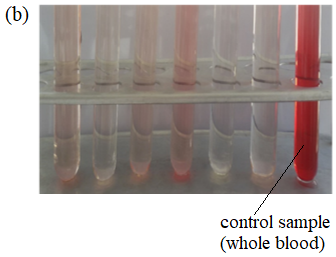


(a) Visual observation of surface wettability through stages; (b) corresponding aqueous solutions used to measure haemoglobin absorbance at 540 nm. From left to right: CB-1, CB-2, *Celox*, bentonite, talc, CaCO3 and control sample.

1.2 Notes for visual inspection of clots

Visual inspection of the samples after blood clotting test

| **Name** | **Visual inspection** | |
| --- | --- | --- |
| **Citrated samples** | **Samples after adding 0.025M CaCl2 and incubation for 10 min** |
| CB-1 | any immediate absorption of a fluid | complete infiltration |
| CB-2 | infiltrates a portion of a total blood volume | swelling |
| *Celox* | infiltrates a portion of a total blood volume | swelling |
| CaCO3 | complete infiltration | complete infiltration |
| Bentonite | complete infiltration | complete immediate infiltration, forming a specific wad in a middle of sample |
| Talc | any immediate absorption of a fluid | poor infiltration |

1.3 Dynamic rheological testing


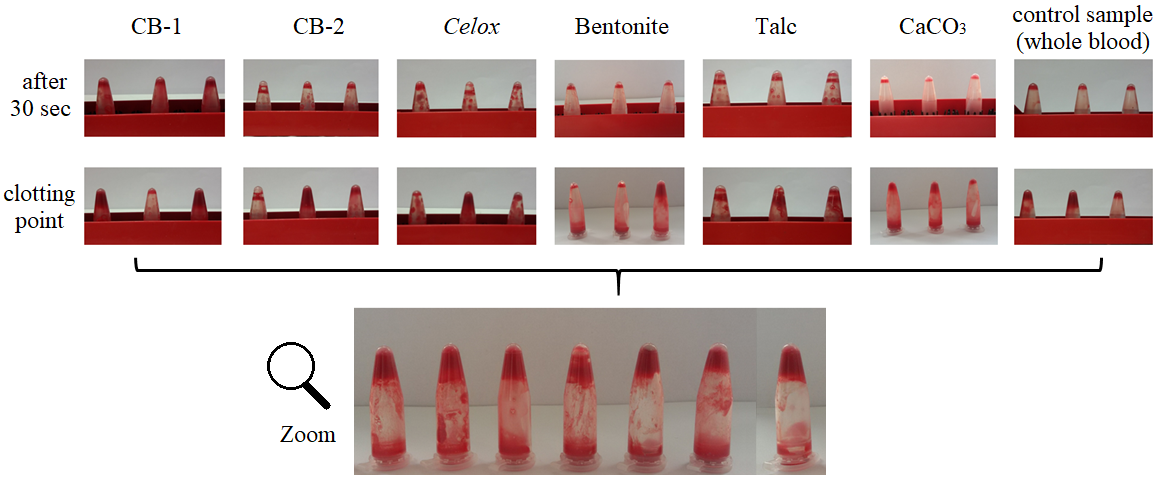


Observation of clot formation during dynamic rheological experiment, n=3, as described by Periayah [22]
